# Supplementary material for: Nutrient status shapes selfish mitochondrial genome dynamics across different levels of selection
Source: eLife. 2020 Sep 22;9:e56686. doi: 10.7554/eLife.56686 (PMC7508553; doi:10.7554/eLife.56686)
Supplement: Figure 2—source data 1. [file elife-56686-fig2-data1.xlsx]

## Sheet: Sheet1
Summary statistics - frequency-dependent change in ∆mtDNA frequency at sub-organismal level
and organismal selection against ∆mtDNA
Selection level	Sub-organismal	Organismal
Units
X-axis	% ∆mtDNA (parents)	Time (generations)
Y-axis	Shift in % ∆mtDNA	Population-wide % ∆mtDNA
	(progeny - parent)	(Mean individual % ∆mtDNA: 60)
Best-fit values
Slope	-0.1975	-2.743
Intercept	15.92	30.07
Std. Error
Slope	0.0546	0.206
Intercept	3.11	1.278
Goodness of Fit
R square	0.3183	0.6945
Sy.x	4.465	5.292
Linear regression statistics
N	30	80
F	13.08	177.3
P (non-zero slope)	0.0012	<0.0001
