# Supplementary material for: Nutrient status shapes selfish mitochondrial genome dynamics across different levels of selection
Source: eLife. 2020 Sep 22;9:e56686. doi: 10.7554/eLife.56686 (PMC7508553; doi:10.7554/eLife.56686)
Supplement: Figure 6—source data 1. [file elife-56686-fig6-data1.xlsx]

## Sheet: Sheet1
Summary statistics - Frequency-dependent change in ∆mtDNA frequency at sub-organismal level, by diet and host genotype
Genotype	Wildtype		daf-16(mu86)
Diet	Control (ad libitum)	Restricted	Control (ad libitum)	Restricted
Units
X-axis	% ∆mtDNA (parents)
Y-axis	Shift in % ∆mtDNA
	(progeny - parent)
Best-fit values
Slope	-0.157	-0.294	-0.189	0.0978
Intercept	10.66	13.34	4.301	-9.319
Standard Error
Slope	0.064	0.125	0.086	0.107
Intercept	3.971	7.78	4.494	5.5
Goodness of Fit
R square	0.214	0.234	0.181	0.0402
Sy.x	3.889	7.063	5.772	8.734
Linear regression statistics
N	24	20	24	22
F	5.992	5.5	4.845	0.8378
P (non-zero slope)	0.0228	0.0307	0.0385	0.3709
