# Supplementary material for: Nutrient status shapes selfish mitochondrial genome dynamics across different levels of selection
Source: eLife. 2020 Sep 22;9:e56686. doi: 10.7554/eLife.56686 (PMC7508553; doi:10.7554/eLife.56686)
Supplement: Figure 6—source data 2. [file elife-56686-fig6-data2.xlsx]

## Sheet: Sheet1
Summary statistics - Frequency-dependent change in ∆mtDNA frequency at organismal level, by diet and host genotype
Genotype	Wildtype		daf-16(mu86)
Diet	Control (ad libitum)	Restricted	Control (ad libitum)	Restricted
Units
X-axis	Time (generations)
Y-axis	Relative % ∆mtDNA
	(normalized to mean sub-organismal % ∆mtDNA)
Best-fit values
Slope	-0.0568	-0.0515	-0.0306	-0.0623
Intercept	0.668	0.777	0.733	0.776
Standard Error
Slope	0.0059	0.0076	0.0052	0.0067
Intercept	0.0298	0.0386	0.0265	0.0336
Goodness of Fit
R square	0.668	0.497	0.424	0.656
Sy.x	0.094	0.121	0.083	0.106
Linear regression statistics
N	48	48	48	48
F	92.65	45.44	33.88	87.55
P (non-zero slope)	<0.0001	<0.0001	<0.0001	<0.0001
P (effect of diet)	0.59		0.0003
